# Supplementary material for: Challenges and suffering of people with advanced illness in rural Nepal: A mixed method multiple case study in four municipalities
Source: Research Square preprint supplement (doi:10.21203/rs.3.rs-8610619/v1), 2026-01-29
Supplement: Supplementary file 1 [file c0207f45002c7ff7f7906c83.docx]

| ID of person – from initial questionnaire |  |
| --- | --- |
| Date of Interview: | Date Month Year |
| Name of Interviewer: | …………………………………………… |

| **Patient Interview** | |
| --- | --- |
| Q.1 | Please tell me about yourself?  *Probe: family, social situation, life at past (active or not), job, how long have they been living at current place* |
| Q.2 | Can you tell me what your life is like now?  *Probe: health, what is your condition? Has anyone told you your diagnosis? How long has condition been going on? How had it changed? What symptoms do you have? How does it affect to your daily life, socially?*  *Satisfaction about life, peace and quality of life* |
| Q.3 | What has been your experience in getting the health care you need?  *Probe: Where have you been for health care? Have you been prescribed medicine? Are you getting medicine regularly (accessibility and cost) ? How easy is it to get to the health facility? Transportation, behavior of health workers towards you,*  Where is your most local health facility? What experience do you have with it?  *Probe: Can you get to it? Does it have the services you need?* |
| Q.4 | What could be changed to make health care better for you? |
| Q.5 | What are your thought about future? How do you feel about it?  *Probe: worry , fear of family members, economic, social, health and death* |
| Q.6 | In your opinion, what could be done to improve the life of people like you?  *Probe: local health facility, community support and income* |
| **Care Giver Interview** | |
| Q.1 | Please tell me about yourself?  *Probe: family, social situation, life at past, job, how long have they been living at current place* |
| Q.2 | Can you tell me about your experience of being a carer?  *Probe: What do you have to do as a carer? What care do you have to give? e.g. dressing, feeding, help to get to toilet, help with medication*  When did you start caring and how much time do you spend in caring? |
| Q.3 | How does being a carer affect you personally?  *Probe:* Physically, psychologically, emotionally, financially  *Are they feeling worried, irritated, stressed?*  *Are there positive things they feel about caring?* |
| Q.5 | Can you tell us about the support you’ve got from others in providing care?  *Probe: community, family, friends and health workers*  And what kind of support, how often? |
| Q.6 | What other things would help you in your caring role?  *Probe: economic, community, family, friends, health workers* |
| Q.7 | What is your experience of the health care services that your person is receiving? |
| Q.8 | What can be done to improve it? |
| **Young Carers Interview** | |
| Q.1 | Please tell me about yourself?  *Probe: family, social situation, life at past, how long have they been living at current place*  Are you going to school/college? Can you tell me about your schooling/ college experience? |
| Q.2 | Can you tell me about your experience as being a carer?  *Probe: What do you have to do as a carer? What care do you have to give? e.g. dressing, feeding, help to get to toilet, help with medication*  When did you start caring and how much time did you spend? |
| Q.3 | How does being a carer affect you personally?  *Probe:* Physically, psychologically, emotionally, financially  *Are they feeling worried, irritated, stressed?* |
| Q.5 | Can you tell us about support you’ve got from others in providing care?  *Probe: community, family, friends and health workers*  And what kind of support, how often? |
| Q.6 | What other things would help you in your caring role?  *Probe: economic, community, family, friends, health workers* |
| Q.7 | What is your experience of the health care services that your person is receiving? |
| Q.8 | What could be done to improve it? |
| Q.9 | How are things going at school/college? How does caring affect school/college for you? - *if has not already been explored.* |
| Q.10 | What do you do for relaxing, seeing friends or as hobbies?  How does being a carer affect doing these things?  Does caring stop you from doing any things you would like to do? Please explain. |
| **KII for School Teacher, Community Leaders, and Health Worker** | |
| Q.1 | What experience do you have with elderly frail, chronic illness, severe disability in this community? |
| Q2 | How do such people receive care in this community?  *Probe: from health services, from the community.*  What are the barriers in accessing health care for these people?  Have you heard about Palliative Care?   1. If yes, what do you understand about it? |
| Q.3 | *For teachers:* Do you have any young careers in your school?   1. If yes, can you tell me what you know about their caring roles?   How does their caring affect their education?  *Probe: Impact on education, Performance, Behaviors and Attendance.*   1. If no: Have you had any young carers in your school before during you career? 2. How would you be able to recognise a young person as a carer? |
| Q.4 | *For Health Care Professionals*  Have you received any training in palliative care?   1. *If yes -* Can you describe the palliative care training you have had?   *Probe: who from, how long was the training,*  Can you describe experiences you have in providing palliative care? How confident are you in providing palliative care? |
| Q.5 | What can be done to improve health services for these patients?  *Probe: new services, accessibility of care.*  What are the things which might help with caring by families or the community for these patients? |

**Thank You!!**

| JolQmsf] cfO{8L – k|f/lDes k|ZgfjnLaf6 |  |
| --- | --- |
| cGtjf{tf{sf] ldlt: | ldlt dlxgf jif{ |
| ;fIffTsf/stf{sf] gfd: | …………………………………………… |

| **la/fdL;Fu cGtjf{tf{** | |
| --- | --- |
| k|=! | s[kof dnfO{ cfˆgf] af/]df atfpg'xf];\ <  *k|f]aM kfl/jfl/s, ;fdflhs cj:yf, ljutsf] hLjg -;lqmo 5 jf 5}g_, hflu/, xfnsf] :yfgdf slt ;dob]lv a:b} cfPsf 5g\<* |
| k|=@ | tkfO{sf] hLjg clxn] s;/L rln/x]sf] 5<  *k|f]aM tkfO{sf] :jf:Yo s:tf] 5 < s] tkfOFnfO{ s;}n] tkfO{sf]] cj:yf÷pkrf/÷lgbfg af/] atf{Psf] 5< tkfO{sf] o:tf] cj:yf ePsf] slt ;do eof] <of] cj:yf s;/L kl/jt{g eof]< tkfO{nfO{ s:tf] lsl;dsf] nIf0fx¿ b]lvPsf] 5 < o;n] tkfO{+sf] b}lgs hLjgdf, ;fdflhs ¿kdf s;/L c;/ u/]sf] 5 <*  s] tkfO{ cfkmgf] hLjgb]vL ;Gt'li6 x'g'x'G5 < s] tkfO{sf] dgdf zflGt 5 < / s] tkfO{ cfkmgf] hLjgsf] u'0f:t/sf] af/]df ;Gt'li6 x'g'x'G5 < |
| k|=# | tkfO{nfO{ rflxg] :jf:Yo ;]jf k|fKt ubf{ tkfO{sf] cg'ej s:tf] /Xof]<  *k|f]aM tkfO{ cfkmgf] :jf:Yo ;]jfsf nflu sxfF hfg'eof<]s] tkfO{nfO{ cf}iflw l;kmfl/; ul/Psf] 5 < s] tkfOF lgoldt ¿kdf cf}iflw lng'x'G5 -kx'Fr / vr{_ :jf:Yo ;+:yf k'Ug slQsf] ;xh 5< oftfoft, tkfOFk|lt :jf:YosdL{sf] Jojxf/*  tkfO{sf] glhs} :yfgLo :jf:Yo ;'ljwf sxfF 5 < o; :jf:Yo ;+:yfdf tkfO{sf] s:tf] cg'ej 5 <  k|f]aM *tkfO{+ o; :jf:Yo ;+:yfdf hfg'ePsf] 5* *< s] o;df tkfO{nfO{ rflxg] ;]jf k|bfg ul/G5 <* |
| k|=$ | tkfO{+sf] ljrf/df tkfO{+sf] nflu :jf:Yo ;]jfnfO{ cem /fd|f] agfpg s] kl/jt{g ug{ ;lsG5< |
| k|=% | tkfO{nfO{ cfkmgf] eljiosf] af/]df s] ljrf/ 5< tkfO{nfO{ cfkmgf] eljiosf] af/]df s:tf] nfU5<  k*|f]aM lrGtf, kl/jf/sf ;b:ox¿sf] 8/, cfly{s, ;fdflhs, :jf:Yo / d[To'* |
| k|=^ | tkfO{sf] ljrf/df tkfO{ h:tf] dflg;x?sf] hLjg:t/df ;'wf/ Nofpg s] ug{ ;lsG5 <  *k|f]aM :yfgLo :jf:Yo ;'ljwf, ;fd'bflos ;xof]u / cfDbfgL* |
| **x]/rfxstf{x? ;Fu cGtjf{tf{** | |
| k|=! | s[kof dnfO{ cfˆgf] af/]df atfpg'xf];\ <  *k|f]aM kfl/jfl/s, ;fdflhs cj:yf, ljutsf] hLjg, hflu/, xfnsf] :yfgdf slt ;dob]lv a:b} cfpg' ePsf] 5 <* |
| k|=@ | s] tkfO{+ dnfO{ x]/rfxstf{sf] ¿kdf cfˆgf] cg'ej atfpg ;Sg'x'G5<  *k|f]aM tkfO{+n] x]/rfxstf{sf] ¿kdf s] ug{'k5{< tkfO{+n] s] x]/rfx ug{' k5{< h:t} n'uf nufpg], v'jfpg], zf}rfno hfg d2t ug]{, cf}iflwdf d2t*  tkfO{+n] x]/rfx ug{ ;'? ug{'ePsf] slxn]] b]lv xf] / slt ;do vr{ ug{'eof]< |
| k|=# | tkfO{+nfO JolQmut ¿kdf x]/rfxstf{ x'g'n] s;/L k|efa kf5{ <  *k|f]aM zf/Ll/s, dgf]j}1flgs, efjgfTds , cfly{s*  s] pxfFx¿ lrlGtt, lr8lr8f, tgfju|:t dx;'; ug{'x'G5<  s] pxfFx¿ x]/rfxsf] af/]df ;s/fTds s'/fx? dx;'; ug{'x'G5< |
| k|=$ | x]/rfx k|bfg ug]{ s|ddf s] tkfO{n] c¿af6 ;xof]u k|fKt ug{'ePsf] 5 , atfpg'; <  *k|f]aM ;d'bfo, kl/jf/, ;fyLx¿ / :jf:YosdL{x¿*  tkfO{+n] s:tf] k|sf/sf] ;xof]u k|fKt ug{'ePsf] 5 / slt k6s< |
| k|=% | tkfO{+nfO{ x]/rfx ug]{ s|ddf c¿ s'g–s'g s'/fn] d2t u5{ <  *k|f]aM cfly{s, ;d'bfo, kl/jf/, ;fyL, :jf:YosdL{* |
| k|=^ | tkfO{+nfO{ la/fdLn] k|fKt u/]sf] :jf:Yo ;]jfx¿df s:tf] cg'ej 5< |
| k|=& | o;nfO{ ;'wf/ ug{ s–]s] ug{ ;lsG5< |
| **o'jf x]/rfxstf{x¿sf] nflu cGtjf{tf{** | |
| k|=! | s[kof dnfO{ cfˆgf] af/]df atfpg'xf];\ <  k|f]aM kfl/jfl/s, ;fdflhs cj:yf, ljutsf] hLjg, hflu/, xfnsf] :yfgdf slt ;dob]lv a:b} cfpg' ePsf] 5 <  s] tkfO{ :s'n÷sn]h hfg'x'G5< s] tkfOF dnfO{ tkfOFsf] :s"n ÷ sn]hsf] cg'ej af/] atfpg ;Sg'x'G5< |
| k|=@ | s] tkfO{+ dnfO{ x]/rfxstf{sf] ¿kdf cfˆgf] cg'ej atfpg ;Sg'x'G5<  *k|f]aM tkfO{+n] x]/rfxstf{sf] ¿kdf s] ug{'k5{< tkfO{+n] s] x]/rfx ug{' k5{< h:t} n'uf nufpg], v'jfpg], zf}rfno hfg d2t ug]{, cf}iflwdf d2t*  tkfO{+n] x]/rfx ug{ ;'? ug{'ePsf] slxn]] b]lv xf] / slt ;do vr{ ug{'eof]< |
| k|=# | tkfO{+nfO JolQmut ¿kdf x]/rfxstf{ x'g'n] s;/L k|efa kf5{ <  k|f]aM zf/Ll/s, dgf]j}1flgs, efjgfTds , cfly{s  s] plgx¿ lrlGtt, lr8lr8f, tgfju|:t dx;'; u5{Gf< |
| k|=$ | x]/rfx k|bfg ug]{ s|ddf s] tkfO{n] c¿af6 ;xof]u k|fKt ug{'ePsf] 5 , atfpg'; <  *k|f]aM ;d'bfo, kl/jf/, ;fyLx¿ / :jf:YosdL{x¿*  tkfO{+n] s:tf] k|sf/sf] ;xof]u k|fKt ug{'ePsf] 5 / slt k6s< |
| k|=% | tkfO{+nfO{ x]/rfx ug]{ s|ddf c¿ s'g–s'g s'/fn] d2t u5{ <  *k|f]aM cfly{s, ;d'bfo, kl/jf/, ;fyL, :jf:YosdL{* |
| k|=^ | tkfO{+nfO{ la/fdLn] k|fKt u/]sf] :jf:Yo ;]jfx¿df s:tf] cg'ej 5< |
| k|=& | o;nfO{ ;'wf/ ug{ s]–s] ug{ ;lsG5< |
| k|=* | tkfOFsf] :s'n÷sn]hdf z}lIfs cj:yf s:tf] 5 < x]/rfxn] tkfOFsf] :s'n÷sn]hsf] lzIffnfO{ s;/L c;/ u5{<- -olb klxn] g} cGj]if0f÷vf]em ul/Psf] 5}g eg*,*]_ |
| k|=( | tkfO{+n] x]/rfxsf] s|ddf cf/fd ug{ ;fyLx¿nfO{ e]6g jf s'g} zf}sx¿ ug{ s] ug{'x'G5<  x]/rfxstf{ x'g'n] oL s'/fx¿nfO{ s;/L c;/ u5{<  s] x]/rfxn] tkfO{+nfO{ cfkm'nfO{ ug{ dg nu]sf] s'g} klg sfd ug{af6 /f]S5< s[kof JofVof ug{'xf];\ { . |
| **ljBfno lzIfs÷;fd'bflos g]tf÷** **dlxnf :jf:Yo :Jod ;]ljsf / :jf:Yo sfo{stf{sf nflu KII** | |
| k|=! | o; ;d'bfodf /x]sf j[4 sdhf]/, bL3{sfnLg /f]uL, uDeL/ czQmtf ePsf JolQmx? k|lt tkfO{sf] s:tf] cg'ej 5< |
| k|=@ | o; ;d'bfodf /x]sf o:tf dflg;x¿n] s;/L x]/rfx kfpF5Gf <  *k|f]aM :jf:Yo ;]jfx¿af6, ;d'bfoaf6.*  o:tf dflg;x¿sf] :jf:Yo ;]jf kx'Frdf s] s:tf cj/f]wx¿ 5g\<  s] tkfO{+n] KoflnPl6e s]o/sf] af/]df ;'Gg'ePsf] 5<  s= olb 5 eg], tkfO{+n] o;sf] af/]df s] a'em\g'x'G5< |
| k|=# | ***lzIfsx¿sf] nflu***  s] tkfOFsf] :s"ndf sf]xL o'jf x]/rfxstf{x¿ 5g<  s= olb 5g eg], s] tkfO{+ dnfO{ atfpg ;Sg'x'G5 ls pgLx¿sf] x]/rfx ug]{ e"ldsfx¿ s] xf]nf<  pgLx¿sf] x]/rfxn] pgLx¿sf]] lzIffdf s:tf] k|efj kf5{<  *k|f]aM lzIff, k|bz{g, Jojxf/ / pkl:ylt*  v= olb 5}gg eg]M s] tkfO{+sf] Sofl/o/sf] bf}8fgdf klxn] tkfO{+sf] :s"ndf s'g} o'jf x]/rfxstf{x¿ lyP<  u= tkfO{+n] s;/L o'jf JolQmnfO{ x]/rfxstf{sf] ¿kdf lrGg ;Sg'x'G5< |
| k|=$ | ***:jf:YosdL{x¿sf nflu***  s] tkfO{+n] KoflnPl6e s]o/ ;DaGwL s'g} tflnd k|fKt ug{'ePsf] 5<  s=olb 5 eg] – s] tkfO{+n] k|fKt ug{'ePsf] KoflnPl6e s]o/ tlndsf] JofVof ug{ ;Sg'x'G5<  *k|f]aM s;af6, slt nfdf]* *÷;dosf] tlnd lyof]?*  s] tkfO{+ KoflnPl6e s]o/ k|bfg ubf{sf] cg'ejx¿ atfpg ;Sg'x'G5< KoflnPl6e s]o/ k|bfg ug{ tkfO{+ slQsf] ljZj:t x'g'x'G5< |
| k|=% | o:tf la/fdLx¿sf] :jf:Yo ;]jfdf ;'wf/ Nofpg s] ug{ ;lsG5<  *k|f]aM gofF ;]jfx¿, x]/rfxsf] kx'Fr.*  oL la/fdLx¿sf] kl/jf/ jf ;d'bfon] x]/rfx ug{ dbt ug{ ;Sg] s'/fx¿ s]–s] x'Gf < |

**wGojfbÛÛ**
